# Supplementary material for: The AFLATOX® Project: Approaching the Development of New Generation, Natural-Based Compounds for the Containment of the Mycotoxigenic Phytopathogen Aspergillus flavus and Aflatoxin Contamination
Source: MDPI journal article supplement (doi:10.3390/ijms22094520), 2021-04-26
Supplement: s1 [file s1]

Table 3S. Growth inhibition data obtained on CrI1790, Hs27, HFL1 and U937 cells after 24 h treatment with different concentration (0-100  $\mu$ M) of 2-actpTS. Data are expressed as mean  $\pm$  standard deviation of three independent experiments.

| Dose ( $\mu$ M) | CrI1790           | Hs27              | HFL1               | U937              |
|-----------------|-------------------|-------------------|--------------------|-------------------|
| <b>0</b>        | 100.00            | 100.00            | 100.00             | 100.00            |
| <b>0.5</b>      | 100.00 $\pm$ 3.63 | 99.92 $\pm$ 7.65  | 100.00 $\pm$ 11.14 | 100.00 $\pm$ 9.43 |
| <b>1</b>        | 95.09 $\pm$ 7.76  | 96.96 $\pm$ 4.78  | 100.00 $\pm$ 6.11  | 100.00 $\pm$ 4.23 |
| <b>5</b>        | 88.36 $\pm$ 2.25  | 100.00 $\pm$ 5.97 | 100.00 $\pm$ 5.74  | 100.00 $\pm$ 6.71 |
| <b>10</b>       | 89.11 $\pm$ 5.24  | 97.71 $\pm$ 3.73  | 100.00 $\pm$ 6.76  | 100.00 $\pm$ 7.06 |
| <b>50</b>       | 81.76 $\pm$ 3.48  | 100.00 $\pm$ 9.25 | 100.00 $\pm$ 4.53  | 100.00 $\pm$ 3.60 |
| <b>100</b>      | 62.04 $\pm$ 4.60  | 87.26 $\pm$ 8.07  | 92.52 $\pm$ 3.49   | 94.72 $\pm$ 8.15  |

Table 4S. Growth inhibition data obtained on Hs27 cells after 24 h treatment with different concentration (0-100  $\mu$ M) of 2-acfurTS-Cu, 2-acfurTS-Zn, 2-actpTS-Cu and 2-actpTS-Zn. Data are expressed as mean  $\pm$  standard deviation of three independent experiments.

| Dose ( $\mu$ M) | 2-acfurTS-Cu      | 2-acfurTS-Zn       | 2-actpTS-Cu      | 2-actpTS-Zn      |
|-----------------|-------------------|--------------------|------------------|------------------|
| <b>0</b>        | 100.00            | 100.00             | 100.00           | 100.00           |
| <b>0.5</b>      | 92.82 $\pm$ 5.53  | 100.00 $\pm$ 7.72  | 90.69 $\pm$ 4.69 | 91.63 $\pm$ 7.33 |
| <b>1</b>        | 99.42 $\pm$ 4.63  | 100.00 $\pm$ 7.88  | 87.09 $\pm$ 3.53 | 94.34 $\pm$ 2.25 |
| <b>5</b>        | 98.87 $\pm$ 12.07 | 100.00 $\pm$ 7.70  | 72.13 $\pm$ 3.35 | 81.89 $\pm$ 5.34 |
| <b>10</b>       | 100.00 $\pm$ 5.93 | 100.00 $\pm$ 12.73 | 16.23 $\pm$ 0.84 | 60.15 $\pm$ 1.57 |
| <b>50</b>       | 36.86 $\pm$ 6.49  | 16.50 $\pm$ 0.62   | 14.64 $\pm$ 0.85 | 15.54 $\pm$ 0.56 |
| <b>100</b>      | 35.65 $\pm$ 1.89  | 15.17 $\pm$ 0.73   | 15.03 $\pm$ 0.20 | 15.96 $\pm$ 1.39 |
