# Supplementary material for: The AFLATOX® Project: Approaching the Development of New Generation, Natural-Based Compounds for the Containment of the Mycotoxigenic Phytopathogen Aspergillus flavus and Aflatoxin Contamination
Source: MDPI journal article supplement (doi:10.3390/ijms22094520), 2021-04-26
Supplement: s1 [file s1]

| Compounds effective in inhibiting the <i>A. flavus</i> growth more than 50% at the concentration 50 µM |           |        |                |                |          |
|--------------------------------------------------------------------------------------------------------|-----------|--------|----------------|----------------|----------|
| Compound                                                                                               | Structure | MW     | Formula        | Group          | G.I. (%) |
| Tosylate -2-methyleneanthraquinone                                                                     |           | 392,43 | C22H16O5S      | Anthraquinone  | 66,0     |
| 3-Phenylpropanal thiosemicarbazone                                                                     |           | 207,30 | C10H13N3S      | Cinnamaldehyde | 100      |
| Cu(II) cinnamaldehyde bithiosemicarbazone                                                              |           | 564,14 | C22H24CuN6O4S2 | Cinnamaldehyde | 58,0     |
| Cu(II) 3-phenylpropanal bithiosemicarbazone                                                            |           | 476,12 | C20H24CuN6S2   | Cinnamaldehyde | 69,0     |
| Ni(II) Cinnamaldehyde bithiosemicarbazone                                                              |           | 467,24 | C20H20NiS2     | Cinnamaldehyde | 87,9     |
| Zn(II) Cinnamaldehyde bithiosemicarbazone                                                              |           | 473,92 | C20H20ZnS2     | Cinnamaldehyde | 56,0     |
| (E)-1-(4-methoxyphenyl)-1-pentene-3-one-3-thiosemicarbazone                                            |           | 263,36 | C13H17N3OS     | Cinnamaldehyde | 62,0     |
| Zn(II) (E)-1-(4-methoxyphenyl)-1-pentene-3-one-bis 3-thiosemicarbazone                                 |           | 590,08 | C26H32ZnN6O2S2 | Cinnamaldehyde | 86,0     |
| Cuminaldehyde thiosemicarbazone                                                                        |           | 221,32 | C11H15N3S      | Cuminaldehyde  | 80,0     |
| Ni(II) Cuminaldehyde bithiosemicarbazone                                                               |           | 499,32 | C22H28NiS2     | Cuminaldehyde  | 84,0     |

|                                                                        |                                                                                     |        |                |                        |      |
|------------------------------------------------------------------------|-------------------------------------------------------------------------------------|--------|----------------|------------------------|------|
| Zn(II) Cuminaldehyde<br>bisthiosemicarbazone                           | 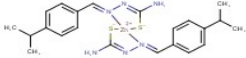   | 506,01 | C22H28N6S2Zn   | Cuminaldehyde          | 56,0 |
| Cu(II) bis acetate 2-<br>isopropylbenzaldehyde<br>bisthiosemicarbazone |    | 652,33 | C28H40CuN6O4S2 | Cuminaldehyde          | 90,0 |
| Cyclohexanone<br>thiosemicarbazone                                     |    | 171,26 | C7H13N3S       | Cyclohexanone          | 80,0 |
| Dicyclohexanone<br>thiosemicarbazone                                   |    | 267,44 | C14H25N3S      | Dicyclohexyl<br>ketone | 90,0 |
| Decanal<br>thiosemicarbazone                                           |    | 229,39 | C11H23N3S      | Decanal                | 96,0 |
| Cu(II) 2,4-decadienal<br>bisthiosemicarbazone                          |  | 512,24 | C22H36CuN6S2   | Decanal                | 91,0 |
| Flavone                                                                |  | 222,24 | C15H10O2       | Flavone                | 66,0 |
| Flavone<br>thiosemicarbazone                                           |  | 295,36 | C16H13N3OS     | Flavone                | 100  |
| Cu(II) 4,7'-dihydroxyflavone<br>bisthiosemicarbazone                   |  | 716,25 | C32H24CuN6O6S2 | Flavone                | 100  |
| Cu(I) chloroqua flavone<br>thiosemicarbazone                           |  | 395,36 | C16H14ClCuN3OS | Flavone                | 60,0 |

|                                                                 |                                                                                     |        |                |                            |      |
|-----------------------------------------------------------------|-------------------------------------------------------------------------------------|--------|----------------|----------------------------|------|
| Nonanal<br>thiosemicarbazone                                    | 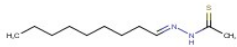   | 214,37 | C11H22N2S      | Nonanal                    | 95,0 |
| 2-Octenal<br>thiosemicarbazone                                  |    | 199,32 | C9H17N3S       | Octanal                    | 93,0 |
| Octanal<br>thiosemicarbazone                                    |    | 201,33 | C9H19N3S       | Octanal                    | 82,0 |
| 2,3-dihydroxybenzaldehyde<br>thiosemicarbazone                  |    | 211,24 | C8H9N3O2S      | Protocatechol-<br>aldehyde | 53,0 |
| Cu(II) 2,3,4-<br>trimethoxybenzaldehyde<br>bisthiosemicarbazone |    | 600,17 | C22H28CuN6O6S2 | Syringaldehyde             | 55,0 |
| Undecanal<br>thiosemicarbazone                                  |    | 242,43 | C13H26N2S      | Undecanal                  | 78,0 |
| Cu(II)undecanal<br>bisthiosemicarbazone                         |   | 548,36 | C24H48CuN6S2   | Undecanal                  | 60,4 |
| Cu(II) apocynin<br>bisthiosemicarbazone                         |  | 540,12 | C20H24CuN6O4S2 | Vanillin                   | 61,0 |

| Compounds effective in inhibiting the <i>A. flavus</i> growth more than 50% at the concentration 100 $\mu$ M |                                                                                     |        |                |                       |          |
|--------------------------------------------------------------------------------------------------------------|-------------------------------------------------------------------------------------|--------|----------------|-----------------------|----------|
| Compound                                                                                                     | Structure                                                                           | MW     | Formula        | Group                 | G.I. (%) |
| Acetylthiophene<br>bisthiosemicarbazone                                                                      | 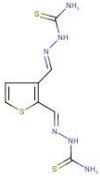 | 286,39 | C8H10N6S3      | 2-<br>Acetylthiophene | 65,0     |
| Cu(II) 2-acetylthiophene<br>bisthiosemicarbazone                                                             |  | 427,99 | C14H16CuN6O2S2 | 2-<br>Acetylthiophene | 63,4     |

|                                                  |                                                                                     |        |              |                   |       |
|--------------------------------------------------|-------------------------------------------------------------------------------------|--------|--------------|-------------------|-------|
| Cu(II) acetylthiophene<br>bisthiosemicarbazone   | 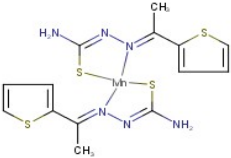   | 451,50 | C14H16MnN6S4 | 2-Acetylthiophene | 53,0  |
| 2-hydroxymethyl-<br>anthraquinone                |    | 238,24 | C15H10O3     | Anthraquinone     | 62,0  |
| 2-Formylanthraquinone                            |    | 236,23 | C15H8O3      | Anthraquinone     | 58,0  |
| Anthraquinone-2-carbonyl-1-<br>thiosemicarbazide |    | 325,34 | C16H11N3O3S  | Anthraquinone     | 58,0  |
| Tosylate -2-<br>methylenanthraquinone            |   | 392,43 | C22H16O5S    | Anthraquinone     | 87,0  |
| Benzophenone<br>thiosemicarbazone                |  | 255,34 | C14H13N3S    | Benzophenone      | 53,0  |
| Camphorquinone bis<br>thiosemicarbazone          |  | 312,45 | C12H20N6S2   | Camphorquinone    | 58,0  |
| 3-Phenylpropanal<br>thiosemicarbazone            |  | 207,30 | C10H13N3S    | Cinnamaldehyde    | 107,0 |
| Cu(II) 3-phenylpropanal<br>bisthiosemicarbazone  |  | 476,12 | C20H24CuN6S2 | Cinnamaldehyde    | 68,0  |
| Cinnamaldehyde<br>thiosemicarbazone              |  | 205,28 | C10H11N3S    | Cinnamaldehyde    | 56,0  |

|                                                                                    |                                                                                     |        |                                                                                 |                |      |
|------------------------------------------------------------------------------------|-------------------------------------------------------------------------------------|--------|---------------------------------------------------------------------------------|----------------|------|
| Ni(II) Cinnamaldehyde<br>bisthiosemicarbazone                                      | 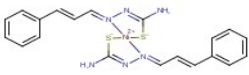   | 467,24 | C <sub>20</sub> H <sub>20</sub> N <sub>6</sub> NiS <sub>2</sub>                 | Cinnamaldehyde | 100  |
| Zn(II) Cinnamaldehyde<br>bisthiosemicarbazone                                      |    | 473,92 | C <sub>20</sub> H <sub>20</sub> N <sub>6</sub> S <sub>2</sub> Zn                | Cinnamaldehyde | 76,0 |
| (E)-1-(4-methoxyphenyl)-1-<br>pentene-3-one-3-<br>thiosemicarbazone                |    | 263,36 | C <sub>13</sub> H <sub>17</sub> N <sub>3</sub> OS                               | Cinnamaldehyde | 74,0 |
| Zn(II) (E)-1-(4-<br>methoxyphenyl)-1-pentene-<br>3-one-bis 3-<br>thiosemicarbazone |    | 590,08 | C <sub>26</sub> H <sub>32</sub> N <sub>6</sub> O <sub>2</sub> S <sub>2</sub> Zn | Cinnamaldehyde | 89,0 |
| Citral<br>thiosemicarbazone                                                        |   | 239,38 | C <sub>12</sub> H <sub>21</sub> N <sub>3</sub> S                                | Citral         | 57,0 |
| Ni(II) citronellal<br>bisthiosemicarbazone                                         |  | 511,42 | C <sub>22</sub> H <sub>40</sub> N <sub>6</sub> NiS <sub>2</sub>                 | Citronellal    | 58,9 |
| Cyclohexanone<br>thiosemicarbazone                                                 |  | 171,26 | C <sub>7</sub> H <sub>13</sub> N <sub>3</sub> S                                 | Cyclohexanone  | 95,0 |
| Cuminaldehyde<br>thiosemicarbazone                                                 |  | 221,32 | C <sub>11</sub> H <sub>15</sub> N <sub>3</sub> S                                | Cuminaldehyde  | 90,0 |
| Ni(II) Cuminaldehyde<br>bisthiosemicarbazone                                       |  | 499,32 | C <sub>22</sub> H <sub>28</sub> N <sub>6</sub> NiS <sub>2</sub>                 | Cuminaldehyde  | 90,0 |
| Zn(II) Cuminaldehyde<br>bisthiosemicarbazone                                       |  | 506,01 | C <sub>22</sub> H <sub>28</sub> N <sub>6</sub> S <sub>2</sub> Zn                | Cuminaldehyde  | 60,3 |

3-isopropyl benzaldehyde-2-methyl-thiosemicarbazone

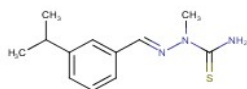

235,35

C12H17N3S

Cuminaldehyde

70,6

Cu(II) 2-isopropyl benzaldehyde-2-methyl-thiosemicarbazone di acetate

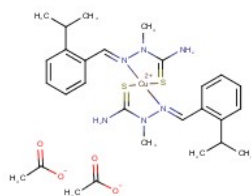

652,33

C28H40CuN6O4S2

Cuminaldehyde

95

Decanal thiosemicarbazone

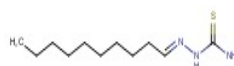

229,39

C11H23N3S

Decanal

96,0

Cu(II) 2,4-decadienal bithiosemicarbazone

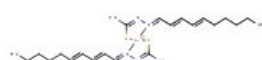

512,24

C22H36CuN6S2

Decanal

80,0

Dicyclohexanone thiosemicarbazone

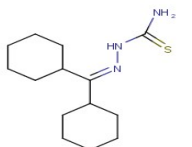

267,44

C14H25N3S

Dicyclohexyl ketone

99,00

Cu(II) fenchone bithiosemicarbazone

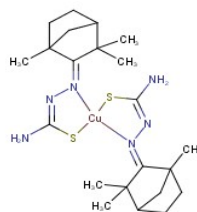

512,24

C22H36CuN6S2

Fenchone

57,0

Flavone

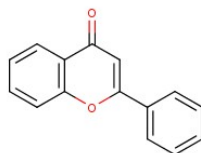

222,24

C15H10O2

Flavone

83,0

Flavone thiosemicarbazone

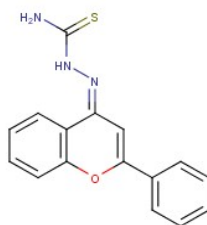

295,36

C16H13N3OS

Flavone

100

Cu(II) 4,7'-dihydroxyflavone bithiosemicarbazone

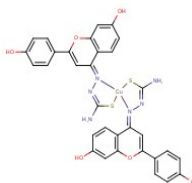

716,25

C32H24CuN6O6S2

Flavone

100

Cu(I) chloro aqua  
flavonethiosemicarbazone

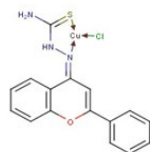

395,36

C<sub>16</sub>H<sub>14</sub>ClCuN<sub>3</sub>O<sub>3</sub>

Flavone

79,0

Heptanal  
thiosemicarbazone

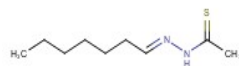

186,32

C<sub>9</sub>H<sub>18</sub>N<sub>2</sub>S

Heptanal

58,00

Cu(II) jasmone  
bisthiosemicarbazone

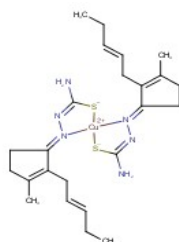

536,26

C<sub>24</sub>H<sub>36</sub>CuN<sub>6</sub>S<sub>2</sub>

Jasmone

74,3

Nonanal  
thiosemicarbazone

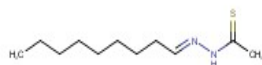

214,37

C<sub>11</sub>H<sub>22</sub>N<sub>2</sub>S

Nonanal

100

Cu(II) nonanal  
bisthiosemicarbazone

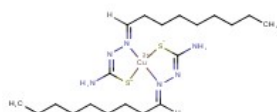

492,25

C<sub>20</sub>H<sub>40</sub>CuN<sub>6</sub>S<sub>2</sub>

Nonanal

84,1

2-Octenal  
thiosemicarbazone

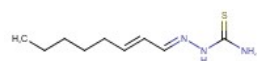

199,32

C<sub>9</sub>H<sub>17</sub>N<sub>3</sub>S

Octanal

96,0

Octanal thiosemicarbazone

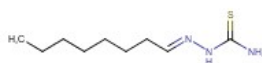

201,33

C<sub>9</sub>H<sub>19</sub>N<sub>3</sub>S

Octanal

93,0

Perillaldehyde  
thiosemicarbazone

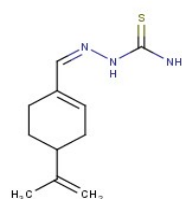

223,34

C<sub>11</sub>H<sub>17</sub>N<sub>3</sub>S

Perillaldehyde

73,5

Plumbagin  
thiosemicarbazone

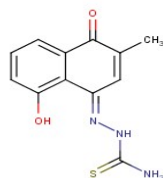

261,30

C<sub>12</sub>H<sub>11</sub>N<sub>3</sub>O<sub>2</sub>S

Plumbagin

61,9

3,4-dihydroxybenzaldehyde  
thiosemicarbazone

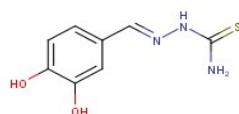

211,24

C<sub>8</sub>H<sub>9</sub>N<sub>3</sub>O<sub>2</sub>S

Protocatechol-  
aldehyde

77,0

|                                                                            |                                                                                     |        |                 |                               |      |
|----------------------------------------------------------------------------|-------------------------------------------------------------------------------------|--------|-----------------|-------------------------------|------|
| <p>Cu(II)<br/>Quinolinecarboxaldehyde<br/>bisthiosemicarbazonate</p>       | 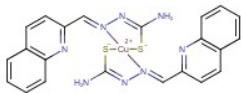   | 522,11 | C22H18CuN8S2    | 2-Quinoline<br>carboxaldehyde | 60,7 |
| <p>Cu(II) syringaldehyde<br/>bisthiosemicarbazonate</p>                    |    | 572,11 | C20H24CuN6O6S2  | Syringaldehyde                | 61,0 |
| <p>Cu(II) 3,4,5-<br/>trimethoxybenzaldehyde<br/>bisthiosemicarbazonate</p> |    | 600,17 | C22H28CuN6O6S2  | Syringaldehyde                | 54,0 |
| <p>Cu(II) undecanal<br/>bisthiosemicarbazonate</p>                         |    | 548,36 | C24H48CuN6S2    | Undecanal                     | 94,0 |
| <p>Undecanal<br/>thiosemicarbazone</p>                                     |    | 242,43 | C13H26N2S       | Undecanal                     | 62,0 |
| <p>Valerophenone<br/>thiosemicarbazone</p>                                 |   | 235,35 | C12H17N3S       | Valerophenone                 | 54,0 |
| <p>Cu(II) apocynin<br/>bisthiosemicarbazonate</p>                          |  | 540,12 | C20H24CuN6O4S2  | Vanillin                      | 72,0 |
| <p>Cu(II) 3,4-<br/>dimethoxybenzaldehyde<br/>bisthiosemicarbazonate</p>    |  | 540,12 | C20H24CuN6O4S2  | Vanillin                      | 51,0 |
| <p>Bisvanillin<br/>thiosemicarbazone</p>                                   |  | 448,52 | C18H20N6O4S2    | Vanillin                      | 57,0 |
| <p>Cu(II) bisvanillin<br/>thiosemicarbazonate</p>                          |  | 958,56 | C36H38CuN12O8S4 | Vanillin                      | 65,5 |
