# Supplementary material for: The AFLATOX® Project: Approaching the Development of New Generation, Natural-Based Compounds for the Containment of the Mycotoxigenic Phytopathogen Aspergillus flavus and Aflatoxin Contamination
Source: MDPI journal article supplement (doi:10.3390/ijms22094520), 2021-04-26
Supplement: s1 [file s1]

Table 2S

| Compounds effective in inhibiting aflatoxin accumulation more than 50% at the concentration 50 $\mu$ M |                                                                                     |        |                |                           |          |
|--------------------------------------------------------------------------------------------------------|-------------------------------------------------------------------------------------|--------|----------------|---------------------------|----------|
| Compound                                                                                               | Structure                                                                           | MW     | Formula        | Group                     | A.I. (%) |
| 2-acetylthiophene<br>thiosemicarbazone                                                                 | 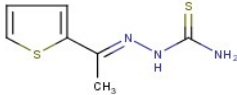   | 199,29 | C7H9N3S2       | 2-Acetylthiophene         | 58,3     |
| Cu(II) 2-acetylthiophene<br>bisthiosemicarbazone                                                       |    | 461,12 | C14H17CuN6S4   | 2-Acetylthiophene         | 56,5     |
| Zn(II) 2-acetylthiophene<br>bisthiosemicarbazone                                                       |    | 461,94 | C14H16N6S4Zn   | 2-Acetylthiophene         | 60,4     |
| Mn(II) 2-acetylthiophene<br>bisthiosemicarbazone                                                       |   | 451,50 | C14H16MnN6S4   | 2-Acetylthiophene         | 61,0     |
| Cu(II) Quinoline<br>carboxaldehyde<br>bisthiosemicarbazone                                             |  | 522,11 | C22H18CuN8S2   | 2-Quinolinecarboxaldehyde | 55,7     |
| Anthraquinone-2-<br>carboxylic acid                                                                    |  | 252,23 | C15H8O4        | Anthraquinone             | 56,0     |
| benzaldehyde<br>4,4'-dimethyl<br>thiosemicarbazone                                                     |  | 207,30 | C10H13N3S      | Benzaldehyde              | 76,0     |
| Cu(II) 1-(3-methoxyphenyl)heptan-<br>1-one<br>bisthiosemicarbazone                                     |  | 648,39 | C30H44CuN6O2S2 | Benzaldehyde              | 82,5     |

|                                                                |                                                                                     |        |              |                |      |
|----------------------------------------------------------------|-------------------------------------------------------------------------------------|--------|--------------|----------------|------|
| Cinnamaldehyde<br>thiosemicarbazone                            | 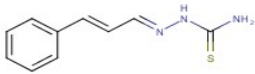   | 205,28 | C10H11N3S    | Cinnamaldehyde | 73,1 |
| Ni(II) Cinnamaldehyde<br>bisthiosemicarbazone                  |    | 467,24 | C20H20N6NiS2 | Cinnamaldehyde | 95,0 |
| Zn(II) Cinnamaldehyde<br>bisthiosemicarbazone                  |    | 473,92 | C20H20N6S2Zn | Cinnamaldehyde | 99,0 |
| Cinnamaldehyde<br>4,4-dimethyl<br>thiosemicarbazone            |    | 233,33 | C12H15N3S    | Cinnamaldehyde | 100  |
| Zn(II) Cinnamaldehyde<br>bis 4,4-dimethyl<br>thiosemicarbazone |   | 530,03 | C24H28N6S2Zn | Cinnamaldehyde | 75,0 |
| Zn(II) 1-<br>isopropylbenzaldehyde<br>bisthiosemicarbazone     |  | 506,01 | C22H28N6S2Zn | Cuminaldehyde  | 55,3 |
| Cuminaldehyde<br>thiosemicarbazone                             |  | 221,32 | C11H15N3S    | Cuminaldehyde  | 100  |
| Ni(II) Cuminaldehyde<br>bisthiosemicarbazone                   |  | 499,32 | C22H28N6NiS2 | Cuminaldehyde  | 91,5 |
| Zn(II) 2-<br>isopropylbenzaldehyde<br>bisthiosemicarbazone     |  | 506,01 | C22H28N6S2Zn | Cuminaldehyde  | 93,8 |

Zn(II) 1-  
isopropylbenzaldehyde  
bis thiosemicarbazone  
diacetate

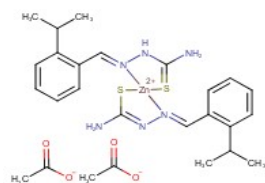

625,10

C26H35N6O4S2Zn

Cuminaldehyde

69,3

2-isopropylbenzaldehyde  
thiosemicarbazone

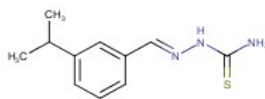

221,32

C11H15N3S

Cuminaldehyde

67,0

Cu(II) 2-  
isopropylbenzaldehyde  
bisthiosemicarbazone

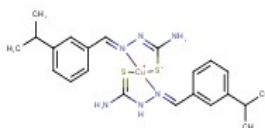

505,18

C22H29CuN6S2

Cuminaldehyde

65,9

Zn(II) Cuminaldehyde  
bisthiosemicarbazone

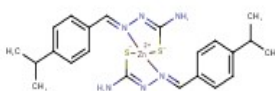

506,01

C22H28N6S2Zn

Cuminaldehyde

97,1

Cu(II) 2-isopropyl  
benzaldehyde-2-methyl-  
thiosemicarbazone di  
acetate

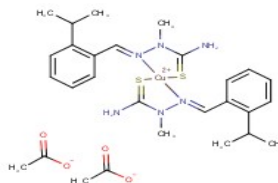

652,33

C28H40CuN6O4S2

Cuminaldehyde

71,4

Cu(II) fenchone  
bisthiosemicarbazone

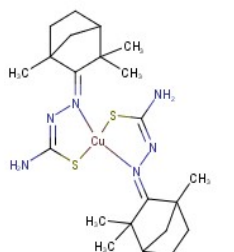

512,24

C22H36CuN6S2

Fenchone

62,0

Cu(II) heptanal  
bisthiosemicarbazone

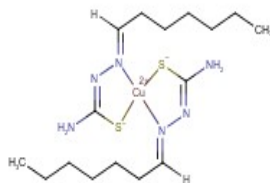

436,14

C16H32CuN6S2

Heptanal

62,8

Dihydrojasmane  
thiosemicarbazone

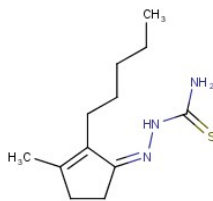

239,38

C12H21N3S

Jasmone

51,5

|                                                 |                                                                                     |        |              |                |      |
|-------------------------------------------------|-------------------------------------------------------------------------------------|--------|--------------|----------------|------|
| Jasmone<br>thiosemicarbazone                    | 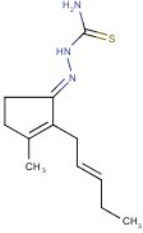   | 237,37 | C12H19N3S    | Jasmone        | 88,0 |
| Cu(II) Dihydrojasmone<br>bisthiosemicarbazonate |    | 540,29 | C24H40CuN6S2 | Jasmone        | 66,0 |
| Cu(II) jasmone<br>bisthiosemicarbazonate        |   | 536,26 | C24H36CuN6S2 | Jasmone        | 78,0 |
| Cu(II) nonanal<br>bisthiosemicarbazonate        |  | 492,25 | C20H40CuN6S2 | Nonanal        | 90,0 |
| Nonanal<br>thiosemicarbazone                    |  | 214,37 | C11H22N2S    | Nonanal        | 91,0 |
| Octanal<br>thiosemicarbazone                    |  | 199,32 | C9H17N3S     | Octanal        | 76,0 |
| Perillaldehyde<br>thiosemicarbazone             |  | 223,34 | C11H17N3S    | Perillaldehyde | 78,0 |

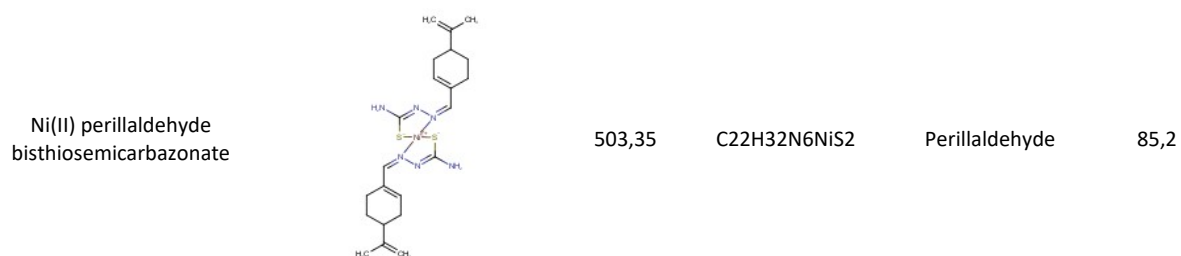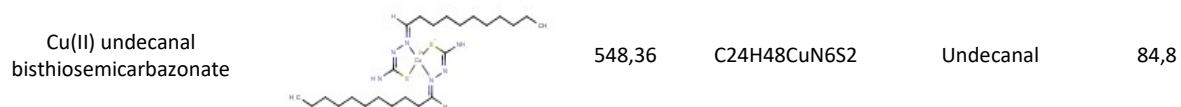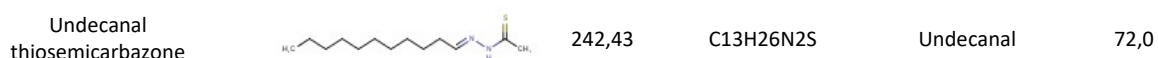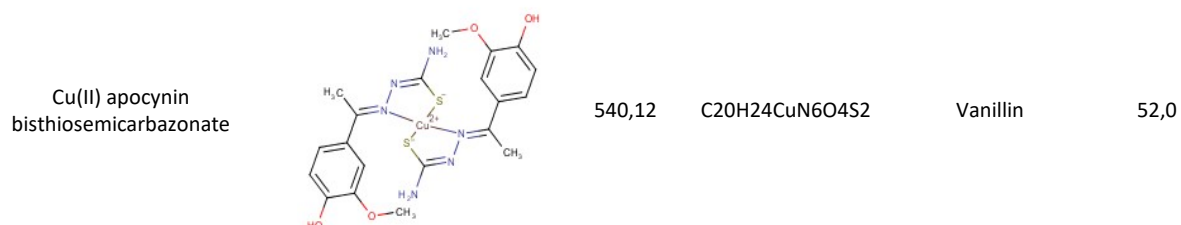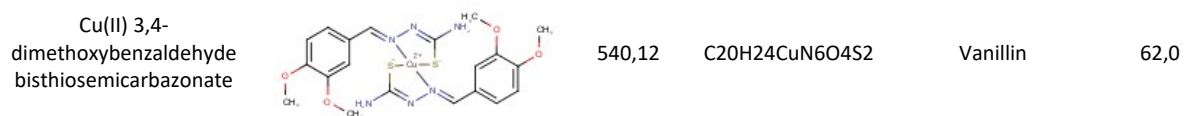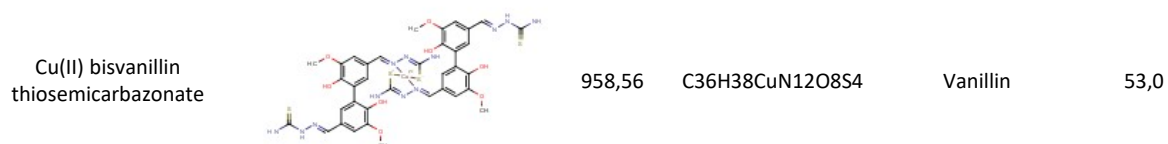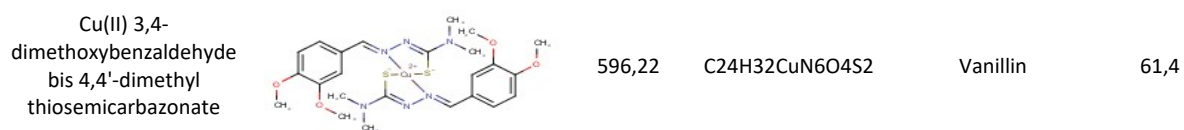

| Compounds effective in inhibiting aflatoxin accumulation more than 50% at the concentration 100 µM |           |        |          |                       |          |
|----------------------------------------------------------------------------------------------------|-----------|--------|----------|-----------------------|----------|
| Compound                                                                                           | Structure | MW     | Formula  | Group                 | A.I. (%) |
| 2-acetylthiophene<br>thiosemicarbazone                                                             |           | 199,29 | C7H9N3S2 | 2-<br>Acetylthiophene | 88,4     |

Cu(II) 2-acetylfurane  
bisthiosemicarbazonate

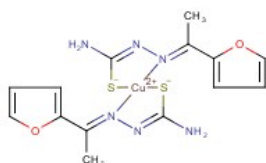

427,99

C14H16CuN6O2S2

2-  
Acetylthiophene

65,7

Cu(II) 2-acetylthiophene  
bisthiosemicarbazonate

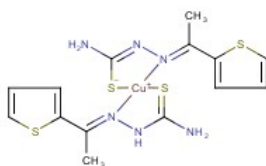

461,12

C14H17CuN6S4

2-  
Acetylthiophene

88,6

Zn(II) 2-acetylthiophene  
bisthiosemicarbazonate

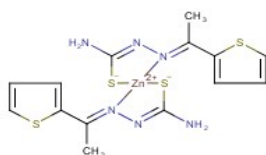

461,94

C14H16N6S4Zn

2-  
Acetylthiophene

85,4

Cu(II) acetylthiophene  
bisthiosemicarbazonate

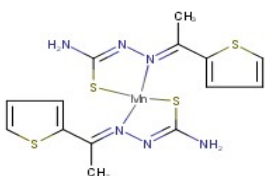

451,50

C14H16MnN6S4

2-  
Acetylthiophene

92,0

Cu(II) Quinoline  
carboxaldehyde  
bisthiosemicarbazonate

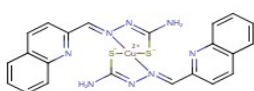

522,11

C22H18CuN8S2

2-Quinoline  
carboxaldehyde

88,0

Anthraquinone-2-  
carboxylic acid

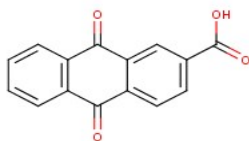

252,23

C15H8O4

Anthraquinone

80,0

Benzaldehyde  
4,4'-dimethyl  
thiosemicarbazone

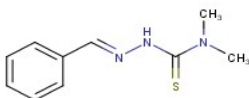

207,30

C10H13N3S

Benzaldehyde

90,0

Cu(II) benzaldehyde  
4,4'-dimethyl  
thiosemicarbazonate

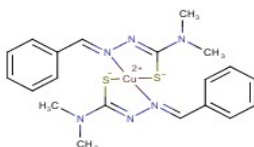

476,12

C20H24CuN6S2

Benzaldehyde

67,0

Cu(II) 1-(3-  
methoxyphenyl)  
heptan-1-one  
bisthiosemicarbazonate

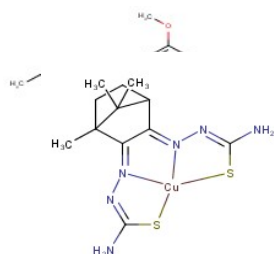

648,39

C30H44CuN6O2S2

Benzaldehyde

95,2

Cu(II) Camphorquinone  
bisthiosemicarbazone

373,98

C<sub>12</sub>H<sub>18</sub>CuN<sub>6</sub>S<sub>2</sub>

Camphorquinone

53,0

Cinnamaldehyde  
thiosemicarbazone

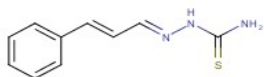

205,28

C<sub>10</sub>H<sub>11</sub>N<sub>3</sub>S

Cinnamaldehyde

79,0

Ni(II) Cinnamaldehyde  
bisthiosemicarbazone

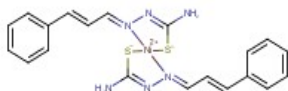

467,24

C<sub>20</sub>H<sub>20</sub>N<sub>6</sub>NiS<sub>2</sub>

Cinnamaldehyde

100

Zn(II) Cinnamaldehyde  
bisthiosemicarbazone

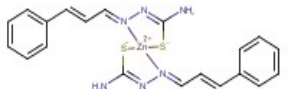

473,92

C<sub>20</sub>H<sub>20</sub>N<sub>6</sub>S<sub>2</sub>Zn

cinnamaldehyde

100

Cinnamaldehyde  
4,4-dimethyl  
thiosemicarbazone

233,33

C<sub>12</sub>H<sub>15</sub>N<sub>3</sub>S

cinnamaldehyde

100

Zn(II) Cinnamaldehyde  
bis 4,4-dimethyl  
thiosemicarbazone

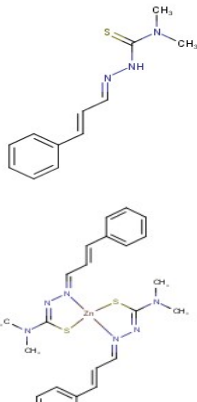

530,03

C<sub>24</sub>H<sub>28</sub>N<sub>6</sub>S<sub>2</sub>Zn

Cinnamaldehyde

100

Cinnamaldehyde  
2-methyl  
thiosemicarbazone

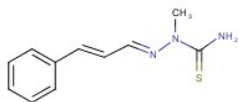

219,31

C<sub>11</sub>H<sub>13</sub>N<sub>3</sub>S

Cinnamaldehyde

64,0

Ni(II) citronellal  
bisthiosemicarbazone

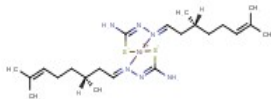

511,42

C<sub>22</sub>H<sub>40</sub>N<sub>6</sub>NiS<sub>2</sub>

Citronellal

82,1

Zn(II) 1-  
isopropylbenzaldehyde  
bisthiosemicarbazonate

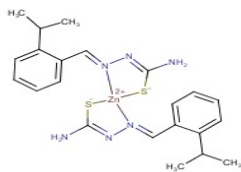

506,01

C<sub>22</sub>H<sub>28</sub>N<sub>6</sub>S<sub>2</sub>Zn

Cuminaldehyde

100

Cuminaldehyde  
thiosemicarbazone

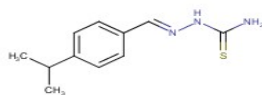

221,32

C<sub>11</sub>H<sub>15</sub>N<sub>3</sub>S

Cuminaldehyde

100

Ni(II) Cuminaldehyde  
bisthiosemicarbazonate

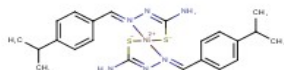

499,32

C<sub>22</sub>H<sub>28</sub>N<sub>6</sub>NiS<sub>2</sub>

Cuminaldehyde

96,0

Zn(II) 2-  
isopropylbenzaldehyde  
bisthiosemicarbazonate

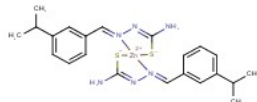

506,01

C<sub>22</sub>H<sub>28</sub>N<sub>6</sub>S<sub>2</sub>Zn

Cuminaldehyde

100

Zn(II) 1-  
isopropylbenzaldehyde  
bis thiosemicarbazone  
diacetate

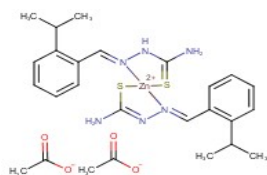

625,10

C<sub>26</sub>H<sub>35</sub>N<sub>6</sub>O<sub>4</sub>S<sub>2</sub>Zn

Cuminaldehyde

81,9

2-isopropylbenzaldehyde  
thiosemicarbazone

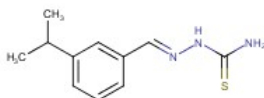

221,32

C<sub>11</sub>H<sub>15</sub>N<sub>3</sub>S

Cuminaldehyde

97,0

Cu(II) 1-  
isopropylbenzaldehyde  
bisthiosemicarbazonate

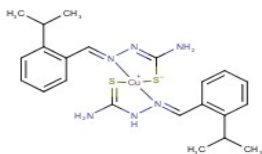

505,18

C<sub>22</sub>H<sub>29</sub>CuN<sub>6</sub>S<sub>2</sub>

Cuminaldehyde

73,5

Cu(II) 2-  
isopropylbenzaldehyde  
bisthiosemicarbazonate

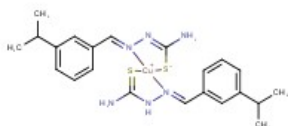

505,18

C<sub>22</sub>H<sub>29</sub>CuN<sub>6</sub>S<sub>2</sub>

Cuminaldehyde

80,8

Zn(II) Cuminaldehyde  
bisthiosemicarbazonate

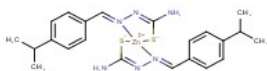

506,01

C<sub>22</sub>H<sub>28</sub>N<sub>6</sub>S<sub>2</sub>Zn

Cuminaldehyde

100



3-isopropyl  
benzaldehyde-2-methyl-  
thiosemicarbazone

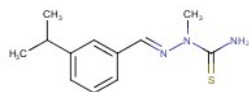

235,35

C<sub>12</sub>H<sub>17</sub>N<sub>3</sub>S

Cuminaldehyde

62,7

Cu(II) 2-isopropyl  
benzaldehyde-2-methyl-  
thiosemicarbazone di  
acetate

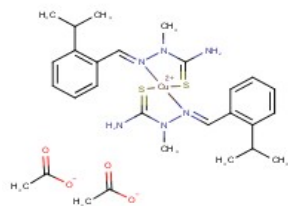

652,33

C<sub>28</sub>H<sub>40</sub>CuN<sub>6</sub>O<sub>4</sub>S<sub>2</sub>

Cuminaldehyde

86,7

Decanal  
thiosemicarbazone

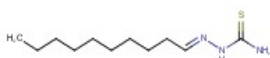

229,39

C<sub>11</sub>H<sub>23</sub>N<sub>3</sub>S

Decanal

62,0

Cu(II) fenchone  
bisthiosemicarbazone

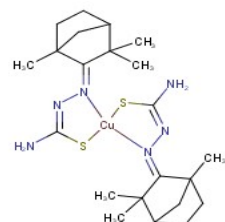

512,24

C<sub>22</sub>H<sub>36</sub>CuN<sub>6</sub>S<sub>2</sub>

Fenchone

84,0

Cu(II) heptanal  
bisthiosemicarbazone

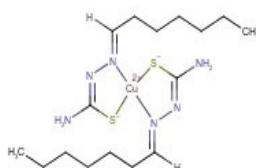

436,14

C<sub>16</sub>H<sub>32</sub>CuN<sub>6</sub>S<sub>2</sub>

Heptanal

85,5

Heptanal  
thiosemicarbazone

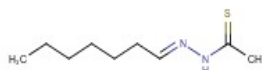

186,32

C<sub>9</sub>H<sub>18</sub>N<sub>2</sub>S

Heptanal

51,0

Valerophenone  
thiosemicarbazone

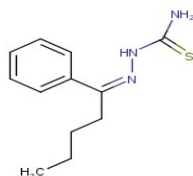

235,35

C<sub>12</sub>H<sub>17</sub>N<sub>3</sub>S

Valerophenone

55,0

Dihydrojasmane  
thiosemicarbazone

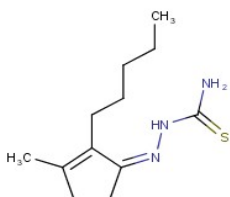

239,38

C<sub>12</sub>H<sub>21</sub>N<sub>3</sub>S

Jasmone

63,2

Jasmone  
thiosemicarbazone

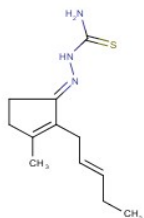

237,37

C<sub>12</sub>H<sub>19</sub>N<sub>3</sub>S

Jasmone

90,0

Cu(II) Dihydrojasmone  
bisthiosemicarbazone

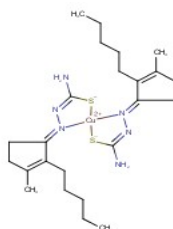

540,29

C<sub>24</sub>H<sub>40</sub>CuN<sub>6</sub>S<sub>2</sub>

Jasmone

80,0

Cu(II) jasmone  
bisthiosemicarbazone

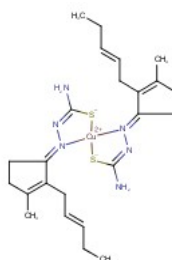

536,26

C<sub>24</sub>H<sub>36</sub>CuN<sub>6</sub>S<sub>2</sub>

Jasmone

97,0

Cu(II) nonanal  
bisthiosemicarbazone

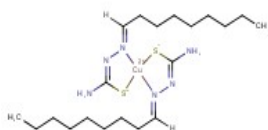

492,25

C<sub>20</sub>H<sub>40</sub>CuN<sub>6</sub>S<sub>2</sub>

Nonanal

100

Nonanal  
thiosemicarbazone

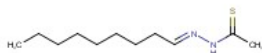

214,37

C<sub>11</sub>H<sub>22</sub>N<sub>2</sub>S

Nonanal

100

Octanal  
thiosemicarbazone

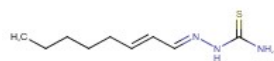

199,32

C<sub>9</sub>H<sub>17</sub>N<sub>3</sub>S

Octanal

96,0

Perillaldehyde  
thiosemicarbazone

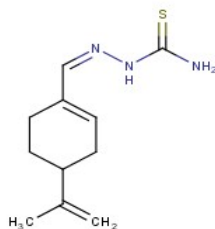

223,34

C<sub>11</sub>H<sub>17</sub>N<sub>3</sub>S

Perillaldehyde

87,3

Ni(II) Perillaldehyde  
bisthiosemicarbazonate

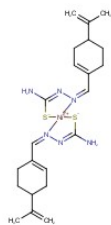

503,35

C<sub>22</sub>H<sub>32</sub>N<sub>6</sub>NiS<sub>2</sub>

Perillaldehyde

90,1

Plumbagin  
thiosemicarbazone

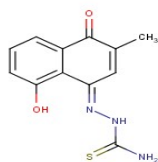

261,30

C<sub>12</sub>H<sub>11</sub>N<sub>3</sub>O<sub>2</sub>S

Plumbagin

83,0

Cu(II) syringaldehyde  
bisthiosemicarbazonate

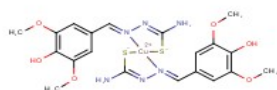

572,11

C<sub>20</sub>H<sub>24</sub>CuN<sub>6</sub>O<sub>6</sub>S<sub>2</sub>

Syringaldehyde

61,0

Cu(II) 3,4,5-  
trimethoxybenzaldehyde  
bisthiosemicarbazonate

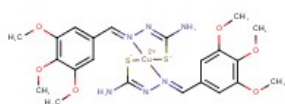

600,17

C<sub>22</sub>H<sub>28</sub>CuN<sub>6</sub>O<sub>6</sub>S<sub>2</sub>

Syringaldehyde

76,0

Cu(II)undecanal  
bisthiosemicarbazonate

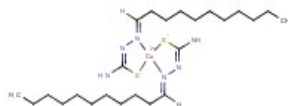

548,36

C<sub>24</sub>H<sub>48</sub>CuN<sub>6</sub>S<sub>2</sub>

Undecanal

96,0

Undecanal  
thiosemicarbazone

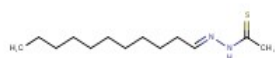

242,43

C<sub>13</sub>H<sub>26</sub>N<sub>2</sub>S

Undecanal

93,0

Cu(II) apocynin  
bisthiosemicarbazonate

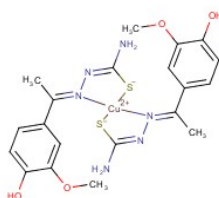

540,12

C<sub>20</sub>H<sub>24</sub>CuN<sub>6</sub>O<sub>4</sub>S<sub>2</sub>

Vanillin

72,0

Cu(II) 3,4-  
dimethoxybenzaldehyde  
bisthiosemicarbazonate

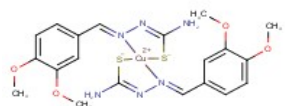

540,12

C<sub>20</sub>H<sub>24</sub>CuN<sub>6</sub>O<sub>4</sub>S<sub>2</sub>

Vanillin

80,0

Bisvanillin  
thiosemicarbazone

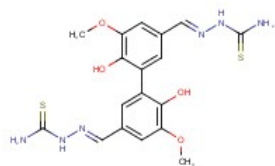

448,52

C<sub>18</sub>H<sub>20</sub>N<sub>6</sub>O<sub>4</sub>S<sub>2</sub>

Vanillin

61,0

Cu(II) bisvanillin  
thiosemicarbazone

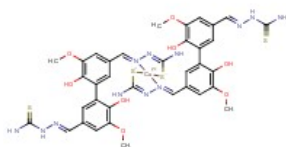

958,56

C<sub>36</sub>H<sub>38</sub>CuN<sub>12</sub>O<sub>8</sub>S<sub>4</sub>

Vanillin

77,0

Cu(II) 3,4-  
dimethoxybenzaldehyde  
bis 4,4'-dimethyl  
thiosemicarbazone

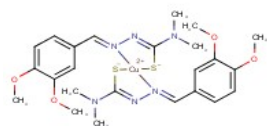

596,22

C<sub>24</sub>H<sub>32</sub>CuN<sub>6</sub>O<sub>4</sub>S<sub>2</sub>

Vanillin

84,6
